# Supplementary material for: Adeno-associated Virus Vector-mediated Interleukin-10 Induction Prevents Vascular Inflammation in a Murine Model of Kawasaki Disease
Source: PubMed Central journal article supplement (PMC5953966; doi:10.1038/s41598-018-25856-0), 2018-05-15
Supplement: 41598_2018_25856_MOESM1_ESM.pdf [file 41598_2018_25856_MOESM1_ESM.pdf]

## **Supplementary information**

### **Adeno-associated Virus Vector-mediated Interleukin-10 Induction Prevents Vascular Inflammation in a Murine Model of Kawasaki Disease**

Jun Nakamura<sup>1,2</sup>, Sachiko Watanabe<sup>1</sup>, Hiroaki Kimura<sup>1</sup>, Motoi Kobayashi<sup>1</sup>,  
Tadayoshi Karasawa<sup>1</sup>, Ryo Kamata<sup>1</sup>, Fumitake Usui-Kawanishi<sup>1</sup>, Ai Sadatomo<sup>1</sup>, Hiroaki  
Mizukami<sup>3</sup>, Noriko Nagi-Miura<sup>4</sup>, Naohito Ohno<sup>4</sup>, Tadashi Kasahara<sup>1</sup>, Seiji Minota<sup>2</sup>, Masafumi  
Takahashi<sup>1\*</sup>

<sup>1</sup>Division of Inflammation Research, <sup>3</sup>Division of Genetic Therapeutics,  
Center for Molecular Medicine, Jichi Medical University, Tochigi, Japan;

<sup>2</sup>Division of Rheumatology and Clinical Immunology, Jichi Medical University, Tochigi, Japan;

<sup>4</sup>Laboratory for Immunopharmacology of Microbial Products, School of Pharmacy, Tokyo  
University of Pharmacy and Life Sciences, Hachioji, Tokyo, Japan

\*Correspondence:

Masafumi Takahashi, MD, PhD

Division of Inflammation Research

Center for Molecular Medicine

Jichi Medical University

3311-1 Yakushiji, Shimotsuke, Tochigi 329-0498, Japan

Tel/ Fax: +81-285-58-7446/+81-285-44-5365

E-mail: [masafumi2@jichi.ac.jp](mailto:masafumi2@jichi.ac.jp)

Supplementary table. List of the primers used in this study

| <b>Gene</b>   | <b>Forward</b>                  | <b>Reverse</b>                 |
|---------------|---------------------------------|--------------------------------|
| <i>Tnfa</i>   | 5'-CCCCAAAGGGATGAGAAGTTC-3'     | 5'-GCTTGTCACCTCGAATTTTGAGAA-3' |
| <i>Il6</i>    | 5'-ACAACCACGGCCTTCCCTACTT-3'    | 5'-CACGATTTCCCAGAGAACATGTG-3'  |
| <i>Il1b</i>   | 5'-TGAAGTTGACGGACCCCAA-3'       | 5'-TGATGTGCTGCTGTGAGATT-3'     |
| <i>Il17a</i>  | 5'-ACGCGCAAACATGAGTCCAG-3'      | 5'-CTCAGCAGCAGCAACAGCATC-3'    |
| <i>Ccl2</i>   | 5'-GGCTCAGCCAGATGCAGTTAAC-3'    | 5'-GCCTACTCATTGGGATCATCTTG-3'  |
| <i>Ccr2</i>   | 5'-CCTGCAAAGACCAGAAGAGGG-3'     | 5'-GAGATGTTGATAGTATGCCGTGGA-3' |
| <i>Mmp2</i>   | 5'-GACATACATCTTTGCAGGAGACAAG-3' | 5'-TCTGCGATGAGCTTAGGGAAA-3'    |
| <i>Mmp9</i>   | 5'-CCTGGAACACACGACATCTTC-3'     | 5'-TGGAAACTCACACGCCAGAA-3'     |
| <i>Timp1</i>  | 5'-GTAAGGCCTGTAGCTGTGCC-3'      | 5'-AGGTGGTCTCGTTGATTCT-3'      |
| <i>Colla1</i> | 5'-GAGCGGAGAGTACTGGATCG-3'      | 5'-GTTCCGGCTGATGTACCAGT-3'     |
| <i>Col3a1</i> | 5'-CCCAACCCAGAGATCCCATT-3'      | 5'-GAAGCACAGGAGCAGGTGTAGA-3'   |
| <i>Tgfb1</i>  | 5'-CTCCCGTGGCTTCTAGTGC-3'       | 5'-GCCTTAGTTTGGACAGGATCTG-3'   |
| <i>Clec4n</i> | 5'-AAGCGGAGCAGAATTCATCA-3'      | 5'-CCATTTGCCATTACCTTGTTGGA-3'  |
| <i>Clec7a</i> | 5'-TGCTTTGTGGTAGTAGTGGTTGCT-3'  | 5'-TGTGGGCTTGTGGTTCTCTTT-3'    |
| <i>Clec4e</i> | 5'-CAGTGGCAATGGGTGGATGATTAC-3'  | 5'-AGTCCCTTATGGTGGCACAGTC-3'   |
| <i>Csf2</i>   | 5'-TCGTCTCTAACGAGTTCTCCTT-3'    | 5'-CGTAGACCCTGCTCGAATATCT-3'   |
| <i>Gapdh</i>  | 5'-TGTGTCCGTCGTGGATCTGA-3'      | 5'-TTCGTGTTGAAGTCGCAGGAG-3'    |

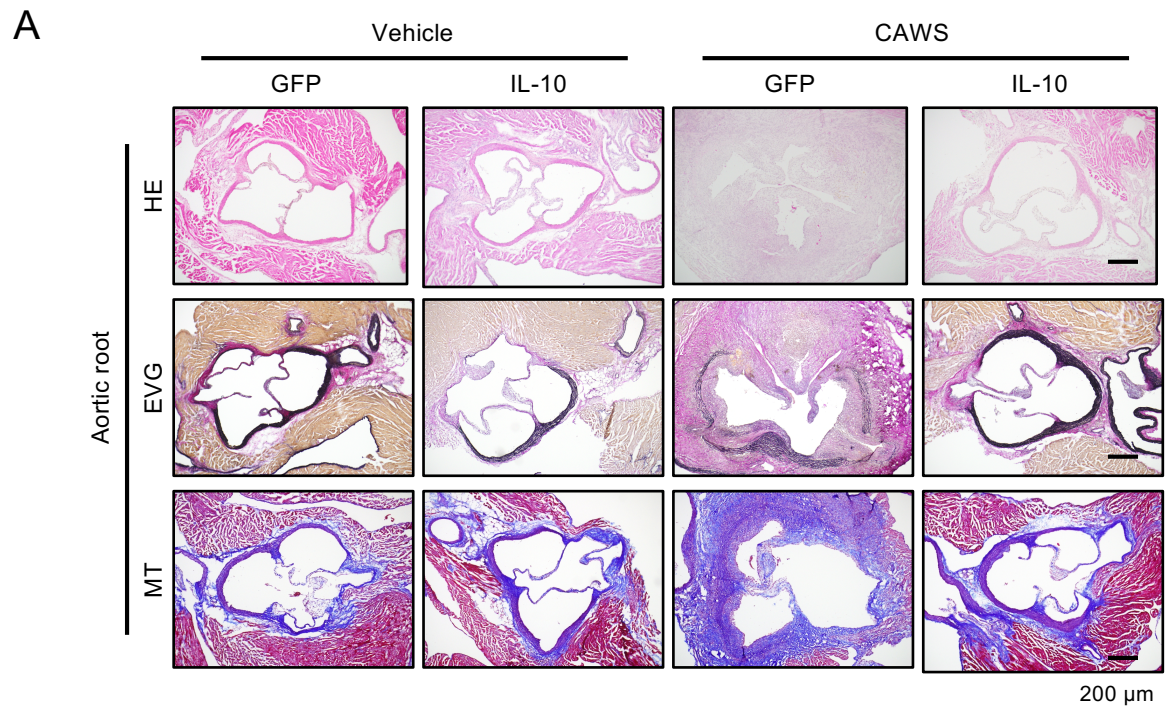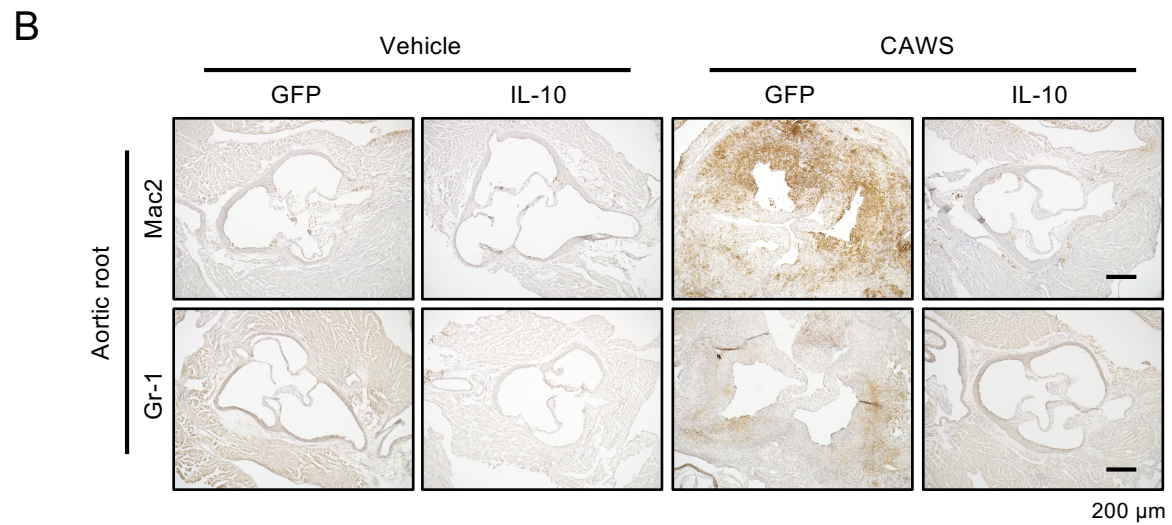

**Supplementary figure S1. Histological analysis of the heart sections at 56 days after CAWS treatment**

Mice were treated intraperitoneally with CAWS or vehicle, 2 weeks after the injection of AAV-GFP (control) or AAV-IL-10. Heart sections were obtained at day 56 after CAWS or vehicle treatment. (A) HE, EVG, and MT staining. (B) Mac2 and Gr-1 immunohistochemical staining. Representative images of the aortic root and coronary artery are shown.

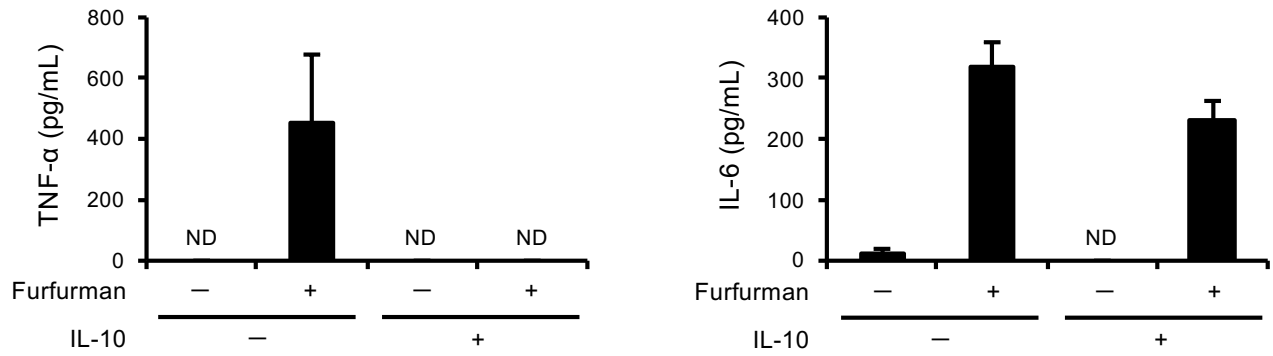

**Supplementary figure S2. Effect of furfurman on the production of TNF- $\alpha$  and IL-6 in BMDCs**

BMDCs were pretreated with or without IL-10 (40 ng/mL) for 1 h, and then treated with furfurman (1–10  $\mu$ g/mL) for 48 h. The TNF- $\alpha$  and IL-6 protein levels in the supernatants were assessed (n = 3).



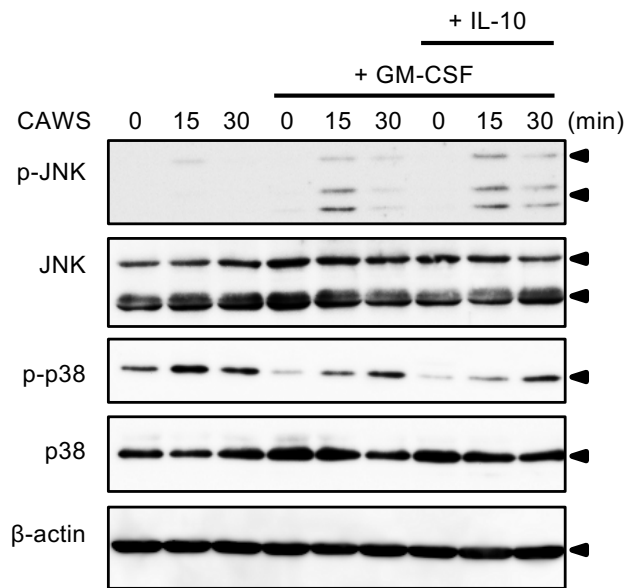

**Supplementary figure S3. Effect of CAWS on the activation of JNK and p38**

BMMs were treated with or without GM-CSF (1 ng/mL) for 48 h. The cells were pretreated with or without IL-10 (40 ng/mL) for 1 h, and then treated CAWS (10 μg/mL) for the indicated periods. Cell lysates were prepared and analyzed by Western blotting with antibodies against JNK, p-JNK, p38, and p-p38.

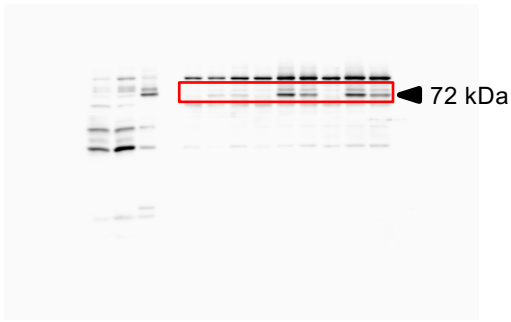

IB: anti-p-Syk

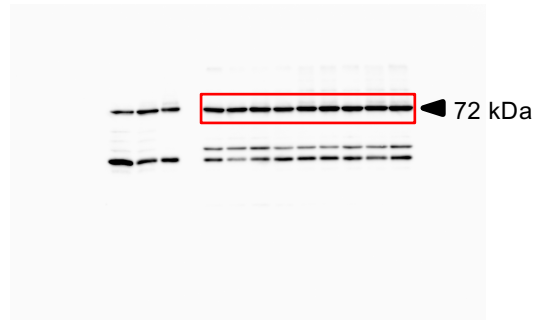

IB: anti-Syk

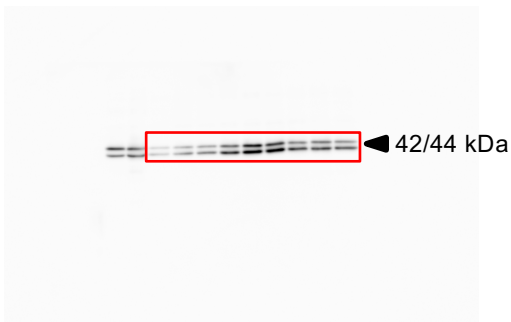

IB: anti-p-ERK1/2

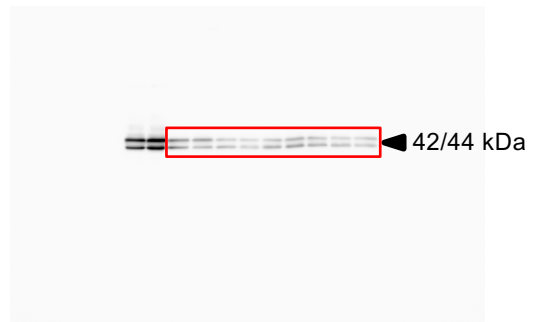

IB: anti-ERK1/2

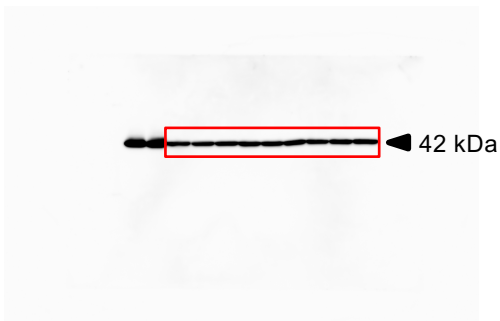

IB: anti-β-actin

**Supplemental figure S4. Uncropped images of Western blotting in Figure 7C**

Cell lysates were prepared and separated by SDS-PAGE and transferred to PVDH membrane. The membrane was immunoblotted with anti-p-Syk (72 kDa), Syk (72 kDa), p-ERK1/2 (42/44 kDa), ERK1/2 (42/44 kDa), or β-actin (42 kDa) antibodies. The cropped parts indicated by the boxes are shown in Figure 7C.

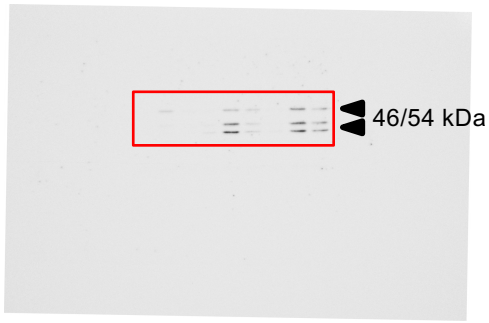

IB: anti-p-JNK

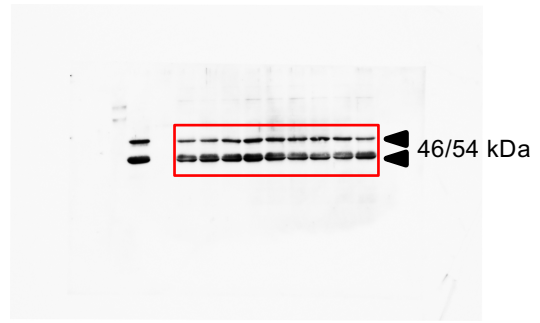

IB: anti-JNK

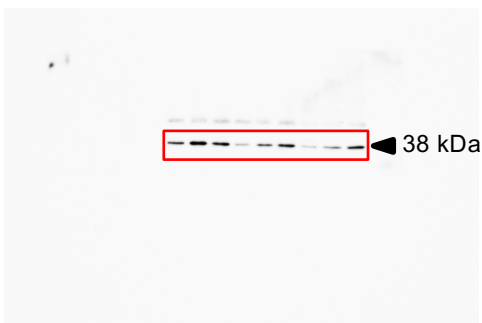

IB: anti-p-p38

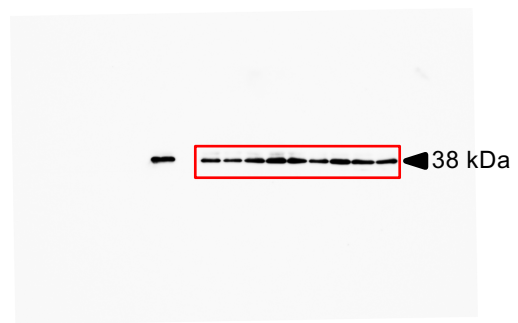

IB: anti-p38

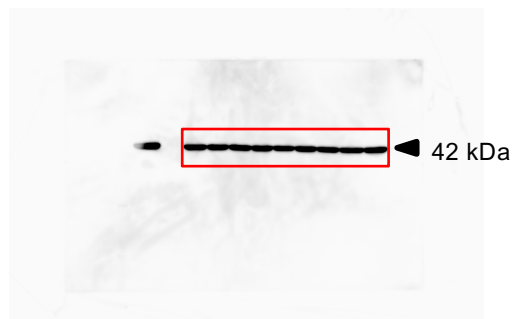

IB: anti- $\beta$ -actin

**Supplemental figure S5. Uncropped images of Western blotting in Supplemental figure S3**

Cell lysates were prepared and separated by SDS-PAGE and transferred to PVDF membrane. The membrane was immunoblotted with anti-p-JNK (46/54 kDa), JNK (46/54 kDa), p-p38 (38kDa), p38 (38 kDa), or  $\beta$ -actin (42 kDa) antibodies. The cropped parts indicated by the boxes are shown in Supplemental figure S3.
